# Supplementary material for: Identifying Causal Genes and Dysregulated Pathways in Complex Diseases
Source: PLoS Comput Biol. 2011 Mar 3;7(3):e1001095. doi: 10.1371/journal.pcbi.1001095 (PMC3048384; doi:10.1371/journal.pcbi.1001095)
Supplement: Table S1 — List of selected target genes. (0.03 MB XLS) [file pcbi.1001095.s002.xls]

## Sheet: target_genes_annotated.txt
Table S1: List of selected target genes. Red labels indicate up-regulation (+) and green labels genes are down-regulated (-).
gene	annotation	+	-
ABCA1	ATP-binding cassette sub-family A member 1
ACCN1	Amiloride-sensitive cation channel 1, neuronal
ADRBK2	Beta-adrenergic receptor kinase 2
ANK3	Ankyrin-3
ANKRD26	Ankyrin repeat domain-containing protein 26
ANXA2	Annexin A2
APLP1	Amyloid-like protein 1
ARHGDIG	Rho GDP-dissociation inhibitor 3
ATP6V1G2	V-type proton ATPase subunit G 2
BCAT1	Branched-chain-amino-acid aminotransferase, cytosolic
BTG1	Protein BTG1
CD163	Scavenger receptor cysteine-rich type 1 protein M130
CDK2	Cell division protein kinase 2
CDK4	Cell division protein kinase 4
CDKN2D	Cyclin-dependent kinase 4 inhibitor D
CFI	Complement factor I
CHEK1	Serine/threonine-protein kinase Chk1
CNIH4	Protein cornichon homolog 4
CSDA	DNA-binding protein A
CTSK	Cathepsin K
CXCR4	C-X-C chemokine receptor type 4
DOCK9	Dedicator of cytokinesis protein 9
EGFR	Epidermal growth factor receptor
ETS1	Protein C-ets-1
F2R	Proteinase-activated receptor 1
FLNA	Filamin-A
FN1	Fibronectin
GABRA4	Gamma-aminobutyric acid receptor subunit alpha-4
GBE1	1,4-alpha-glucan-branching enzyme
GBP1	Interferon-induced guanylate-binding protein 1
GNS	N-acetylglucosamine-6-sulfatase
GOT1	Aspartate aminotransferase, cytoplasmic
HEXB	Beta-hexosaminidase subunit beta
HMGB2	High mobility group protein B2
HTR2A	5-hydroxytryptamine receptor 2A
IGFBP2	Insulin-like growth factor-binding protein 2
IGFBP3	Insulin-like growth factor-binding protein 3
LAMC1	Laminin subunit gamma-1
LPL	Lipoprotein lipase
MAP1A	Microtubule-associated protein 1A
MCM3	DNA replication licensing factor MCM3
MDK	Midkine
MMP2	72 kDa type IV collagenase
MSN	Moesin
NELL1	Protein kinase C-binding protein NELL1
PCNA	Proliferating cell nuclear antigen
PEG3	Paternally-expressed gene 3 protein
PLAU	Urokinase-type plasminogen activator
PLSCR1	Phospholipid scramblase 1
PPP2R2C	Serine/threonine-protein phosphatase 2A 55 kDa regulatory subunit B gamma isoform
PRRX1	Paired mesoderm homeobox protein 1
PTX3	Pentraxin-related protein PTX3
RAB3A	Ras-related protein Rab-3A
RBBP8	Retinoblastoma-binding protein 8
SHC1	SHC-transforming protein 1
SHMT2	Serine hydroxymethyltransferase, mitochondrial
SMC4	Structural maintenance of chromosomes protein 4
SNAP91	Clathrin coat assembly protein AP180
SNRPG	Small nuclear ribonucleoprotein G
SSTR1	Somatostatin receptor type 1
STMN1	Stathmin
STXBP1	Syntaxin-binding protein 1
SYNGR1	Synaptogyrin-1
TCF3	Transcription factor E2-alpha
TGFB2	Transforming growth factor beta-2
TNFRSF10B	Tumor necrosis factor receptor superfamily member 10B
TP53	Cellular tumor antigen p53
TP53I3	Quinone oxidoreductase PIG3
TPRKB	TP53RK-binding protein
TRIM22	E3 ubiquitin-protein ligase TRIM22
TSPAN6	Tetraspanin-6
UBE2C	Ubiquitin-conjugating enzyme E2 C
VAMP2	Vesicle-associated membrane protein 2
WEE1	Wee1-like protein kinase
