# Supplementary material for: Identifying Causal Genes and Dysregulated Pathways in Complex Diseases
Source: PLoS Comput Biol. 2011 Mar 3;7(3):e1001095. doi: 10.1371/journal.pcbi.1001095 (PMC3048384; doi:10.1371/journal.pcbi.1001095)
Supplement: Table S2 — List of 128 causal genes. (0.04 MB XLS) [file pcbi.1001095.s003.xls]

## Sheet: target_genes_annotated.txt
Table S2: List of 128 causal genes. Red labels indicate if the gene is located in a genomic area of genomic amplification (+). Green labels indicate if the gene is located in an area of deletion (-).
gene	annotation	+	-
ABCA1	ATP-binding cassette sub-family A member 1
ACP1	Low molecular weight phosphotyrosine protein phosphatase
ADCY8	Adenylate cyclase type 8
AGA	N(4)-(beta-N-acetylglucosaminyl)-L-asparaginase
AHR	Aryl hydrocarbon receptor
AKAP6	A-kinase anchor protein 6
AKAP9	A-kinase anchor protein 9
AKT1	RAC-alpha serine/threonine-protein kinase
ANXA11	Annexin A11
ANXA2	Annexin A2
APP	Amyloid beta A4 protein
ARHGAP11A	Rho GTPase-activating protein 11A
ARHGAP29	Rho GTPase-activating protein 29
ATR	Serine/threonine-protein kinase ATR
BUB3	Mitotic checkpoint protein BUB3
CAD	CAD protein
CAMK2G	Calcium/calmodulin-dependent protein kinase type II subunit gamma
CCNC	Cyclin-C
CDC2	Cell division control protein 2 homolog
CDC5L	Cell division cycle 5-like protein
CDKN2A	Cyclin-dependent kinase inhibitor 2A, isoform 4
CEBPA	CCAAT/enhancer-binding protein alpha
CEP70	Centrosomal protein of 70 kDa
CFH	Complement factor H
CHUK	Inhibitor of nuclear factor kappa-B kinase subunit alpha
COBL	cordon-bleu homolog
CRMP1	Dihydropyrimidinase-related protein 1
CSF2	Granulocyte-macrophage colony-stimulating factor
CSNK2A1	Casein kinase II subunit alpha
CUL1	Cullin-1
DARC	Duffy antigen/chemokine receptor
DDX56	Probable ATP-dependent RNA helicase DDX56
DIAPH3	Protein diaphanous homolog 3
DLC1	Rho GTPase-activating protein 7
EFNA5	Ephrin-A5
EGFR	Epidermal growth factor receptor
EIF2B1	Translation initiation factor eIF-2B subunit alpha
EIF3A	Eukaryotic translation initiation factor 3 subunit A
EIF3B	Eukaryotic translation initiation factor 3 subunit B
EIF3F	Eukaryotic translation initiation factor 3 subunit F
ELMO1	Engulfment and cell motility protein 1
EPB41	Protein 4.1
ERBB4	Receptor tyrosine-protein kinase erbB-4
ERCC6	DNA excision repair protein ERCC-6
FAS	Tumor necrosis factor receptor superfamily member 6
FER	Tyrosine-protein kinase Fer
FHL2	Four and a half LIM domains protein 2
GBAS	Protein NipSnap homolog 2
GBE1	1,4-alpha-glucan-branching enzyme
GSTK1	Glutathione S-transferase kappa 1
HEATR1	HEAT repeat-containing protein 1
HSDL2	Hydroxysteroid dehydrogenase-like protein 2
IFNA4	Interferon alpha-4
ILK	Integrin-linked protein kinase
ITGB3BP	Centromere protein R
KITLG	Kit ligand
LMO7	LIM domain only protein 7
MAP2K4	Dual specificity mitogen-activated protein kinase kinase 4
MCM7	DNA replication licensing factor MCM7
MED10	Mediator of RNA polymerase II transcription subunit 10
MON2	Protein MON2 homolog
MRLC2	myosin regulatory light chain
MS4A1	B-lymphocyte antigen CD20
NDUFA4	NADH dehydrogenase [ubiquinone] 1 alpha subcomplex subunit 4
NDUFB8	NADH dehydrogenase [ubiquinone] 1 beta subcomplex subunit 8, mitochondrial
NRXN1	Neurexin-1-alpha
NUP205	Nuclear pore complex protein Nup205
NUPL1	Nucleoporin p58/p45
ORC5L	Origin recognition complex subunit 5
PARP1	Poly [ADP-ribose] polymerase 1
PCDH7	Protocadherin-7
POLR1A	DNA-directed RNA polymerase I subunit RPA1
POLR2J	DNA-directed RNA polymerase II subunit RPB11-a
POLR3A	DNA-directed RNA polymerase III subunit RPC1
POLR3B	DNA-directed RNA polymerase III subunit RPC2
POM121	Nuclear envelope pore membrane protein POM 121
PPIA	Peptidyl-prolyl cis-trans isomerase A
PRIM1	DNA primase small subunit
PRKAB1	5'-AMP-activated protein kinase subunit beta-1
PRKCA	Protein kinase C alpha type
PSAP	Proactivator polypeptide
PSMA1	Proteasome subunit alpha type-1
PSMA4	Proteasome subunit alpha type-4
PSMA5	Proteasome subunit alpha type-5
PSMB1	Proteasome subunit beta type-1
PSMC3	26S protease regulatory subunit 6A
PSMC6	26S protease regulatory subunit S10B
PTEN	Phosphatidylinositol-3,4,5-trisphosphate 3-phosphatase and dual-specificity protein phosphatase PTEN
PTK2B	Protein-tyrosine kinase 2-beta
PTPRD	Receptor-type tyrosine-protein phosphatase delta
PTPRJ	Receptor-type tyrosine-protein phosphatase eta
PTPRK	Receptor-type tyrosine-protein phosphatase kappa
RAI14	Ankycorbin
RB1	Retinoblastoma-associated protein
RBMX	Heterogeneous nuclear ribonucleoprotein G
RBPMS	RNA-binding protein with multiple splicing
REL	Proto-oncogene c-Rel
RGL1	Ral guanine nucleotide dissociation stimulator-like 1
RHOBTB2	Rho-related BTB domain-containing protein 2
RPL10	60S ribosomal protein L10
RPL10L	60S ribosomal protein L10-like
RPS17	40S ribosomal protein S17
SEC61A2	Protein transport protein Sec61 subunit alpha isoform 2
SF3B4	Splicing factor 3B subunit 4
SFRS2	Splicing factor, arginine/serine-rich 2
SFRS3	Splicing factor, arginine/serine-rich 3
SGCB	Beta-sarcoglycan
SLC25A4	ADP/ATP translocase 1
SLC27A2	Very long-chain acyl-CoA synthetase
SNRPB2	U2 small nuclear ribonucleoprotein B''
SPTA1	Spectrin alpha chain, erythrocyte
STXBP6	Syntaxin-binding protein 6
SYNGR1	Synaptogyrin-1
TAF2	Transcription initiation factor TFIID subunit 2
TERF2IP	Telomeric repeat-binding factor 2-interacting protein 1
THBS1	Thrombospondin-1
TOP1	DNA topoisomerase 1
TP53	Cellular tumor antigen p53
TRIP13	Thyroid receptor-interacting protein 13
TSSC1	Protein TSSC1
U2AF2	Splicing factor U2AF 65 kDa subunit
UBE3A	Ubiquitin-protein ligase E3A
USF2	Upstream stimulatory factor 2
VAV3	Guanine nucleotide exchange factor VAV3
VDAC2	Voltage-dependent anion-selective channel protein 2
VIM	Vimentin
VWF	von Willebrand factor
ZNF107	Zinc finger protein 107
