# Supplementary material for: Identifying Causal Genes and Dysregulated Pathways in Complex Diseases
Source: PLoS Comput Biol. 2011 Mar 3;7(3):e1001095. doi: 10.1371/journal.pcbi.1001095 (PMC3048384; doi:10.1371/journal.pcbi.1001095)
Supplement: Table S3 — List of enriched GO biological processes in causal subnetworks. (0.03 MB XLS) [file pcbi.1001095.s004.xls]

## Sheet: topnodes2.txt
Table S3: List of enriched GO biological processes in causal subnetworks. To avoid redundancy, we listed only the most specific terms if more than one terms in the GO hierarchical paths were found. # represents the number of causal subnetworks which are enriched wtih the given GO terms.
biological process	#
cell cycle arrest	10
epidermal growth factor receptor signaling pathway	9
negative regulation of cell growth	9
Ras protein signal transduction	9
regulation of sequestering of triglyceride	8
cell proliferation	7
nuclear mRNA splicing, via spliceosome	7
regulation of cholesterol storage	7
nucleotide-excision repair	7
RNA elongation from RNA polymerase II promoter	7
insulin receptor signaling pathway	6
transcription initiation from RNA polymerase II promoter	6
N-terminal peptidyl-lysine acetylation	5
phosphoinositide-mediated signaling	5
positive regulation of lipid storage	4
positive regulation of specific transcription from RNA polymerase II	3
positive regulation of epithelial cell proliferation	3
base-excision repair	2
negative regulation of hydrolase activity	2
gland development	2
positive regulation of MAP kinase activity	2
regulation of nitric-oxide synthase activity	2
estrogen receptor signaling pathway	2
regulation of receptor biosynthetic process	2
response to organic substance	2
JAK-STAT cascade	2
regulation of transforming growth factor-beta2 production	2
G1/S transition of mitotic cell cycle	2
SMAD protein nuclear translocation	2
G2/M transition of mitotic cell cycle	1
regulation of chromosome organization	1
regulation of foam cell differentiation	1
positive regulation of fibroblast migration	1
regulation of ubiquitin-protein ligase activity during mitotic cell-cycle	1
regulation of lipid kinase activity	1
negative regulation of fibrinolysis	1
androgen receptor signaling pathway	1
signal complex assembly	1
DNA-dependent DNA replication	1
positive regulation of blood vessel endothelial cell migration	1
positive regulation of chemotaxis	1
lipid homeostasis	1
positive regulation of cytokine production	1
negative regulation of fatty acid metabolic process	1
anti-apoptosis	1
chemotaxis	1
cellular respiration	1
response to hypoxia	1
DNA damage response, signal transduction by p53 class mediator resulting in induction of apoptosis	1
activation of NF-kappaB-inducing kinase activity	1
organelle organization	1
anaphase-promoting complex-dependent proteasomal ubiquitin-dependent protein catabolic process	1
response to virus	1
odontogenesis	1
protein amino acid dephosphorylation	1
negative regulation of transport	1
positive regulation of cyclin-dependent protein kinase activity	1
ER overload response	1
negative regulation of specific transcription from RNA polymerase II promoter	1
cell junction organization	1
positive regulation of I-kappaB kinase/NF-kappaB cascade	1
cellular response to glucose starvation	1
response to retinoic acid	1
negative regulation of blood vessel endothelial cell migration	1
activation of caspase activity by cytochrome c	1
SMAD protein signal transduction	1
traversing start control point of mitotic cell cycle	1
muscle organ development	1
positive regulation of myeloid cell differentiation	1
provirus integration	1
response to progesterone stimulus	1
JNK cascade	1
negative regulation of cell cycle process	1
DNA packaging	1
rRNA processing	1
regulation of epidermal growth factor receptor activity	1
response to radiation	1
regulation of DNA replication	1
response to estrogen stimulus	1
ribosomal large subunit biogenesis	1
